# Supplementary material for: The Value Clarification Hypothesis: Explaining a Striking Asymmetry in the Link Between Education and Moral Attitudes
Source: Research Square preprint supplement (doi:10.21203/rs.3.rs-7658969/v1), 2025-10-14
Supplement: Supplementary file 1 [file e6008ef5ab76ebbcbe10ee71.docx]

Online Resource

# Measurement of Argument Advantages in Study 3

To obtain argument advantage scores for the selected issues in the NZAVS, we conducted a study on the Prolific platform. Aiming for approximately 100 respondents per issue, we recruited 537 New Zealand participants, who were randomly assigned to evaluate 15 issues each; in the final data, at least 99 respondents contributed to the calculation of argument advantages for every issue. Following the same general procedure as in [Vartanova et al. 2021](https://www.zotero.org/google-docs/?8HFM1R), participants were presented with one issue at a time (e.g., “It is OK for parents to use smacking as a way to discipline their children”) and asked to indicate their agreement using a dichotomous response (“agree” or “disagree”). Participants were then instructed to reflect on their reasoning for their response. They were shown a randomized list containing one argument for each of the five moral foundations, drawn from a pool of 15 items, and asked to select all arguments that applied. Arguments were adapted to align with their initial response (e.g., “Yes, because otherwise someone is denied his or her rights” or “No, because then someone is denied his or her rights”). Subsequently, participants were asked to consider the reasoning of someone with the opposite view. They were presented with the same set of arguments, reworded to reflect the opposing perspective, and selected the arguments they believed would apply. This procedure ensured that each participant evaluated arguments for both sides of the issue.

## Calculating the Argument Advantage

On every issue *iss* there are two opposing attitudes ‘for’ and ‘against’. Let A*iss*,for(Harm) be the proportion of respondents who said that Harm provides a viable argument for the ‘for’ attitude. We similarly obtain A*iss*,against(Harm), A*iss*,for(Fairness), and A*iss*,against(Fairness). The argument advantage of the ‘for’ attitude is obtained as

AA*iss*,for = [A*iss*,for(Harm) - A*iss*,against(Harm) + A*iss*,for(Fairness) - A*iss*,against(Fairness)] / 2

We say that the argument advantage is significant for an issue if a 95 % confidence interval for AA*iss*,for does not include zero.

# Robustness Check Using GEE for Repeated Measures in NZAVS

For the NZAVS data, the multilevel logistic regressions violated the assumption of normally distributed random intercepts for several issues, which could bias the coefficients of interest. As a robustness check, we therefore re-tested the NZAVS hypotheses using generalized estimating equations (GEE) with a logistic link function. This approach accounts for the repeated-measure structure of the data by specifying a correlation structure between observations within individuals (assumed to be equal in our models) and does not require normally distributed random intercepts [(Fitzmaurice, Laird, and Ware 2011)](https://www.zotero.org/google-docs/?XuML69). Below, we report the results for each hypothesis using the alternative GEE model.

*Hypothesis 1: The education-liberal attitudes link is stronger among liberals than conservatives*

The prediction was correct for 27 of 29 issues (0.931, 95% CI [.772, .992], *p* < .001).

*Hypothesis 2: The interaction effect is stronger for issues with high argument advantages*

The argument advantage was positively related to the interaction effect between ideology and education (*b* = 0.259, SE = 0.023, *t*(27) = 11.353, *p* < .001). The model explained 82% of the variance (adjusted *R*² = .82).

## Pre-registered test in the NZAVS

*Hypothesis: The interaction effect is stronger for issues with high argument advantages*

In support of the hypothesis, the argument advantage was positively related to the interaction effect when the dichotomized attitude variable was reverse coded for issues with a negative argument advantage (*β* = .352, 95% CI [.05, .66], *p* = .025).

| **Table S1.** A combined three-way interaction model as a test of H2. | | | | |
| --- | --- | --- | --- | --- |
|  | **GSS** | | **NZAVS** | |
| *Predictors* | *Odds Ratios* | *std. Error* | *Odds Ratios* | *std. Error* |
| (Intercept) | 1.096 *** | 0.00 | 2.141 *** | 0.008 |
| Educ (Scaled) | 1.054 *** | 0.00 | 1.040 *** | 0.004 |
| Ideology | 1.060 *** | 0.00 | 1.519 *** | 0.005 |
| Argument Advantage (AA) | 1.606 *** | 0.01 | 5.482 *** | 0.014 |
| Educ (Scaled) x Ideology | 1.025 *** | 0.00 | 1.054 *** | 0.003 |
| Educ (Scaled) x AA | 1.267 *** | 0.02 | 1.219 *** | 0.003 |
| Ideology x AA | 1.259 *** | 0.01 | 1.908 *** | 0.004 |
| Educ (Scaled) x Ideology x AA | 1.096 *** | 0.01 | 1.097 *** | 0.002 |
| **Random Effects** | | | | |
| σ2 | 3.29 | | 3.29 | |
| τ00 id | 0.06 | | 0.28 | |
| ICC | 0.02 | | 0.08 | |
| N id | 62 556 | | 36 816 | |
| Observations | 2 298 200 | | 1 913 417 | |
| Marginal R2 / Conditional R2 | 0.100 / 0.115 | | 0.508 / 0.546 | |
| ***Note.***Standardized coefficients are reported. For continuous predictors, coefficients represent the expected change in the log-odds of agreement associated with a one standard deviation increase in the predictor. For binary predictors (e.g., ideology in NZAVS), coefficients represent the group difference between categories. Interaction terms indicate how the effect of one predictor changes across levels (or standard deviations) of another. Significance levels: * *p<0.05 ** p<0.01 *** p<0.001.* | | | | |

**Argument advantages for the 98 moral issues in the GSS.**

| **Morsal issue code** | **Moral issue wording** | **Argument advantage** |
| --- | --- | --- |
| abany | Do you think it should be possible for a pregnant woman to obtain a legal abortion if the woman wants it for any reason? | -0.010 |
| abdefctw | Do you personally think it is wrong for a woman to have an abortion if there is a strong chance of serious defect in the baby. | -0.034 |
| abdefect | Do you think it should be possible for a pregnant woman to obtain a legal abortion if there is a strong chance of serious defect in the baby? | -0.023 |
| abhlth | Do you think it should be possible for a pregnant woman to obtain a legal abortion if the woman's own health is seriously endangered by the pregnancy? | 0.123* |
| abnomore | Do you think it should be possible for a pregnant woman to obtain a legal abortion if she is married and does not want any more children? | 0.054 |
| abpoor | Do you think it should be possible for a pregnant woman to obtain a legal abortion if the family has a very low income and cannot afford any more children? | 0.081 |
| abpoorw | Do you personally think it is wrong for a woman to have an abortion if the family has a very low income and cannot afford any more children. | 0.013 |
| abrape | Do you think it should be possible for a pregnant woman to obtain a legal abortion if she became pregnant as a result of rape? | 0.262* |
| absingle | Do you think it should be possible for a pregnant woman to obtain a legal abortion if she is not married and does not want to marry the man? | 0.034 |
| advfront | Even if it brings no immediate benefits - scientific research that advances the frontiers of knowledge is necessary and should be supported by the federal government. | 0.047 |
| affrmact | Some people say that because of past discrimination - blacks should be given preference in hiring and promotion. Others say that such preference in hiring and promotion of blacks is wrong because it discriminates against whites. What about your opinion - are you for preferential hiring and promotion of blacks? | 0.000 |
| amownway | America should follow its own interests - even if this leads to conflicts with other nations. | -0.178* |
| amtv | American television should give preference to American films and programs. | -0.189* |
| busdecid | Government should let businesses decide for themselves how to protect the environment - even if it means they don't always do the right thing - rather than passing laws to make businesses protect the environment as it interferes with business' right to make their own decisions. | -0.078* |
| busing | In general: do you favor the busing of African-American and white school children from one school district to another? | 0.109* |
| cappun | Do you favor the death penalty for persons convicted of murder? | -0.041 |
| careself | Those in need have to learn to take care of themselves and not depend on others. | -0.310* |
| clerggov | Religious leaders should not try to influence government decisions. | 0.062 |
| clergvte | Religious leaders should not try to influence how people vote in elections. | 0.032 |
| colath | There are always some people whose ideas are considered bad or dangerous by other people. For instance: somebody who is against all churches and religion -- should such a person be allowed to teach in a college or university? | 0.250* |
| colcom | Consider a man who admits he is a Communist. Suppose he is teaching in a college. Should he be fired? | -0.267* |
| colhomo | Consider a man who admits that he is a homosexual. Should such a person be allowed to teach in a college or university? | 0.514* |
| colmil | Consider a person who advocates doing away with elections and letting the military run the country. Should such a person be allowed to teach in a college or university? | 0.109* |
| colmslm | Now consider a Muslim clergyman who preaches hatred of the United States. Should such a person be allowed to teach in a college or university? | 0.054 |
| colrac | Consider a person who believes that Blacks are genetically inferior. Should such a person be allowed to teach in a college or university? | -0.168* |
| fefam | It is much better for everyone involved if the man is the achiever outside the home and the woman takes care of the home and family. | -0.293* |
| fehelp | It is more important for a wife to help her husband's career than to have one herself. | -0.257* |
| fehire | Because of past discrimination employers should make special efforts to hire and promote qualified women. | 0.097* |
| fehome | Women should take care of running their homes and leave running the country up to men. | -0.398* |
| fejobaff | Some people say that because of past discrimination women should be given preference in hiring and promotion. Others say that such preference in hiring and promotion of women is wrong because it discriminates against men. What about your opinion - are you for preferential hiring and promotion of women? | 0.084* |
| fework | Do you approve of a married woman earning money in business or industry if she has a husband capable of supporting her? | 0.217* |
| forland | Foreigners should not be allowed to buy land in America. | -0.204* |
| grass | Do you think the use of marijuana should be made legal? | 0.193* |
| grnlaws | On the whole - do you think it should be the government's responsibility to impose strict laws to make industry do less damage to the environment? | 0.086* |
| gunlaw | Would you favor a law which would require a person to obtain a police permit before he or she could buy a gun? | -0.095* |
| helpblk | Some people think that African-Americans have been discriminated against for so long that the government has a special obligation to help improve their living standards. Others believe that the government should not be giving special treatment to African-Americans. Do you think that the government should help improve the living standards of African-Americans? | 0.262* |
| helppoor | Some people think that the government in Washington should do everything possible to improve the standard of living of all poor Americans. Other people think it is not the government's responsibility and that each person should take care of himself. Do you think that the government should do everything possible to improve the standard of living of all poor Americans? | 0.373* |
| helpsick | In general some people think that it is the responsibility of the government in Washington to see to it that people have help in paying for doctors and hospital bills. Others think that these matters are not the responsibility of the federal government and that people should take care of these things themselves. Do you think that it is the responsibility of the government? | 0.446* |
| hitbeatr | Would you approve of a man punching a stranger who was beating up a woman and the man saw it? | 0.243* |
| hitchild | Would you approve of a man punching a stranger who had hit the man's child after the child accidentally damaged the stranger's car? | 0.109* |
| hitdrunk | Would you approve of a man punching a stranger who was drunk and bumped into the man and his wife on the street? | -0.134* |
| hitmarch | Would you approve of a man punching a stranger who was in a protest march showing opposition to the other man's views? | -0.338* |
| hitok | Are there any situations that you can imagine in which you would approve of a man punching an adult male stranger? | -0.048 |
| hitrobbr | Would you approve of a man punching a stranger who had broken into the man's house? | 0.066 |
| homosex | What about sexual relations between two adults of the same sex--do you think it is always wrong? | -0.272* |
| hubbywrk | A man's job is to earn money - a woman's job is to look after the home and family. | -0.273* |
| ifwrong | People should support their country even if the country is in the wrong. | -0.237* |
| letdie1 | When a person has a disease that cannot be cured -- do you think doctors should be allowed by law to end the patient's life by some painless means if the patient and his family request it? | 0.252* |
| libath | There are always some people whose ideas are considered bad or dangerous by other people. For instance somebody who is against all churches and religion. If some people in your community suggested that a book he wrote against churches and religion should be taken out of your public library -- would you favor removing this book? | -0.150* |
| libcom | Consider a man who admits he is a Communist. Suppose he wrote a book which is in your public library. Somebody in your community suggests that the book should be removed from the library. Would you favor removing it? | -0.209* |
| libhomo | Consider a man who admits that he is a homosexual. If some people in your community suggested that a book he wrote in favor of homosexuality should be taken out of your public library -- would you favor removing this book? | -0.356* |
| libmil | Consider a person who advocates doing away with elections and letting the military run the country. Suppose he wrote a book advocating doing away with elections and letting the military run the country. Somebody in your community suggests that the book be removed from the public library. Would you favor removing it? | -0.190* |
| librac | Consider a person who believes that Blacks are genetically inferior. If some people in your community suggested that a book he wrote which said Blacks are inferior should be taken out of your public library -- would you favor removing this book? | 0.158* |
| marasian | Would you be in favor of having a close relative or family member marry an Asian American person? | 0.272* |
| marblk | Would you be in favor of having a close relative or family member marry a black person? | 0.369* |
| marhisp | Would you be in favor of having a close relative or family member marry a Hispanic American person? | 0.292* |
| marhomo | Homosexual couples should have the right to marry one another. | 0.471* |
| marlegit | People who want children ought to get married. | -0.076* |
| marwht | Would you be in favor of having a close relative or family member marry a white person? | 0.159* |
| mincult | Ethnic minorities should be given government assistance to preserve their customs and traditions. | 0.126* |
| obeylaw | In general - would you say that people should obey the law without exception rather than there are exceptional occasions on which people should follow their consciences even if it means breaking the law? | -0.053 |
| othshelp | People should be willing to help others who are less fortunate. | 0.255* |
| pillok | Do you agree that methods of birth control should be available to teenagers between the ages of 14 and 16 if their parents do not approve? | 0.241* |
| polabuse | Would you approve of a policeman striking a citizen who had said vulgar and obscene things to the policeman? | -0.294* |
| polattak | Would you approve of a policeman striking a citizen who was attacking the policeman with his fists? | -0.127* |
| polescap | Would you approve of a policeman striking a citizen who was attempting to escape from custody? | -0.252* |
| polhitok | Are there any situations you can imagine in which you would approve of a policeman striking an adult male citizen? | -0.231* |
| polmurdr | Would you approve of a policeman striking a citizen who was being questioned as a suspect in a murder case? | -0.414* |
| pornlaw | Consider your feelings about pornography laws. Do you think it should be illegal? | 0.000 |
| premarsx | There's been a lot of discussion about the way morals and attitudes about sex are changing in this country. If a man and woman have sex relations before marriage -- do you think it is wrong? | -0.123* |
| pubdecid | Government should let ordinary people decide for themselves how to protect the environment - even if it means they don't always dothe right thing - rather than passing laws to make ordinary people protect the environment as it interferes with people's right to make their own decisions. | -0.043 |
| punsin | Those who violate God's rules must be punished. | -0.243* |
| racchng | If you and your friends belonged to a social club that would not let African-Americans join -- would you try to change the rules so that African-Americans could join? | 0.535* |
| racfew | Would you yourself have any objection to sending your children to a school where a few of the children are African-Americans? | -0.128* |
| rachaf | Would you yourself have any objection to sending your children to a school where half of the children are African-Americans? | -0.119* |
| racmar | Do you think there should be laws against marriages between African-Americans and whites? | -0.397* |
| racmost | Would you yourself have any objection to sending your children to a school where more than half of the children are African-Americans? | -0.170* |
| racopen | Suppose there is a community-wide vote on the general housing issue. There are two possible laws to vote on (OWNER DECIDES and CAN'T DISCRIMINATE). Would you vote for owner decides? | -0.424* |
| racpush | African-Americans shouldn't push themselves where they're not wanted. | -0.384* |
| racseg | White people have a right to keep African-Americans out of their neighborhoods if they want to and African-Americans should respect that right. | -0.509* |
| sexeduc | Would you be for sex education in the public schools? | 0.099* |
| spanking | Do you agree that it is sometimes necessary to discipline a child with a good hard spanking? | -0.358* |
| spkath | Consider somebody who is against all churches and religion. If such a person wanted to make a speech in your (city/town/community) against churches and religion -- should he be allowed to speak? | 0.197* |
| spkcom | Consider a man who admits he is a Communist. Suppose this admitted Communist wanted to make a speech in your community. Should he be allowed to speak? | 0.189* |
| spkhomo | Consider a man who admits that he is a homosexual? Suppose this admitted homosexual wanted to make a speech in your community. Should he be allowed to speak? | 0.333* |
| spkmil | Consider a person who advocates doing away with elections and letting the military run the country. If such a person wanted to make a speech in your community -- should he be allowed to speak? | 0.212* |
| spkmslm | Now consider a Muslim clergyman who preaches hatred of the United States. If such a person wanted to make a speech in your community preaching hatred of the United States - should he be allowed to speak? | 0.108* |
| spkrac | Consider a person who believes that Blacks are genetically inferior. If such a person wanted to make a speech in your community claiming that Blacks are inferior -- should he be allowed to speak? | -0.224* |
| suicide1 | Do you think a person has the right to end his or her own life if this person has an incurable disease? | 0.181* |
| suicide2 | Do you think a person has the right to end his or her own life if this person has gone bankrupt? | -0.005 |
| suicide3 | Do you think a person has the right to end his or her own life if this person has dishonored his or her family? | -0.075* |
| suicide4 | Do you think a person has the right to end his or her own life if this person is tired of living and ready to die? | 0.129* |
| teensex | Consider people who are in their early teens -- say 14 to 16 years old. In that case: do you think sex relations before marriage are wrong? | -0.024 |
| twoincs | Both the husband and the wife should contribute to the household income. | 0.116* |
| wirtap | Everything considered: would you say that -- in general -- you approve of wiretapping? | -0.246* |
| wrkwayup | Irish and Italians and Jewish and many other minorities overcame prejudice and worked their way up. Blacks should do the same without special favors. | -0.099* |
| wrldgovt | For certain problems - like environmental pollution - international bodies should have the right to enforce solutions. | 0.090* |
| xmarsex | What is your opinion about a married person having sexual relations with someone other than the marriage partner--is it wrong? | 0.127* |

**Argument advantages for the 36 moral issues in the New Zealand Attitudes and Values Survey.**

| **Moral issue code** | **Moral issue wording** | **Argument advantage** |
| --- | --- | --- |
| Issue.Abortion.AnyReason | Legalized abortion for women, regardless of the reason. | 0.357* |
| Issue.Abortion.SpecificReason | Legalized abortion when the woman’s life is endangered. | 0.347* |
| Issue.AntiSmackBill | The current anti-smacking bill (it being illegal to smack children). | 0.466* |
| Issue.BanHateSpeech | People who hold opinions that are harmful or offensive to minority groups should be banned from expressing those views publicly. | 0.330* |
| Issue.BreastFeedPublic | Women should avoid breastfeeding in public. | -0.446* |
| Issue.CivilUnion | The Civil Union Act (allowing couples, regardless of gender, to legally formalize their relationship with rights similar to marriage). | 0.545* |
| Issue.Equality01 | We are all New Zealanders and the law should not make provision for minority groups because of their ethnicity. | 0.014 |
| Issue.Euthanasia | If a person has a painful incurable disease, doctors should be allowed by law to end the patient’s life if the patient requests it. | 0.426* |
| Issue.Foreign.Farm | Restricting foreign ownership of New Zealand farms. | -0.240* |
| Issue.Foreign.Residential | Restricting foreign ownership of New Zealand residential property. | -0.120* |
| Issue.GovtSurveillance | Collection of telephone and internet data by the New Zealand Government as part of anti-terrorism efforts. | -0.108* |
| Issue.HistNeg01 | We should all move on as one nation and forget about past differences and conflicts between ethnic groups. | 0.097 |
| Issue.NZ.Flag.Change | The design of the New Zealand flag should be changed. | 0.093* |
| Issue.NZ.Foreign.Investors.Farms | Foreign investors should be able to buy NZ farms. | 0.180* |
| Issue.ParentalCorrection | A smack as part of good parental correction should be a criminal offence in NZ. | 0.374* |
| Issue.Pol.Cannabis | Personal use of recreational cannabis should be legalised. | 0.307* |
| Issue.ResPolOp02 | Reserving places for Māori students to study medicine. | -0.030 |
| Issue.RWA02 | It would be best for everyone if the proper authorities censored magazines so that people could not get their hands on trashy and disgusting material. | -0.114* |
| Issue.RWA04 | People should pay less attention to The Bible and other old traditional forms of religious guidance, and instead develop their own personal standards of what is moral and immoral. | 0.222* |
| Issue.SameSexMarriage | Same-sex marriage in NZ (The Marriage Amendment Act 2013). | 0.615* |
| Issue.SDO01 | It is OK if some groups have more of a chance in life than others. | -0.475* |
| Issue.SDO02 | Inferior groups should stay in their place. | -0.569* |
| Issue.SDO03 | To get ahead in life, it is sometimes okay to step on other groups. | -0.568* |
| Issue.SDO04 | We should have increased social equality. | 0.475* |
| Issue.SDO06 | We should do what we can to equalise conditions for different groups. | 0.560* |
| Issue.SexOffenderDatabase | A publicly available online database of all convicted sex offenders in NZ. | -0.340* |
| Issue.SexualPrejudice01 | I think that homosexuality should be accepted by society. | 0.653* |
| Issue.SmackingAtt | It is OK for parents to use smacking as a way to discipline their children. | -0.414* |
| Issue.SymPolOp01 | Performance of the Haka at international sports events. | -0.020 |
| Issue.SymPolOp02 | Waitangi Day as a national celebration of biculturalism. | 0.131* |
| Issue.SymPolOp03 | Teaching Māori language in New Zealand primary schools. | 0.030 |
| Issue.SymPolOp04 | Singing the national anthem in Māori and English. | 0.158* |
| Issue.TeReo.BilingualSignage | Displaying signage in public places in both Māori and English. | 0.130* |
| Issue.ThreeStrikes | The current '3 Strikes' law for violent/sexual offences (the maximum possible sentence must be imposed without parole upon the third conviction). | -0.074 |
| Issue.WomenPolOp02 | Introducing a programme to enhance sustainable business growth among businesses owned and operated by women. | -0.005 |
| Issue.WomenPolOp03 | Affirmative action policies for women promoting entry into female-under-represented occupations, such as construction and the trades. | 0.167* |
